# Supplementary material for: Dynamic changes in replication timing and gene expression during lineage specification of human pluripotent stem cells
Source: PubMed Central journal article supplement — Genome Res. 2015 Aug;25(8):1091–103. doi: 10.1101/gr.187989.114 (PMC4509994; doi:10.1101/gr.187989.114), 2015-08
Supplement: supp_gr.187989.114_Supplemental_Methods.pdf [file supp_gr.187989.114_Supplemental_Methods.pdf]

## Dynamic changes in replication timing and gene expression during lineage specification of human pluripotent stem cells

Juan Carlos Rivera-Mulia<sup>1</sup>, Quinton Buckley<sup>1</sup>, Takayo Sasaki<sup>1</sup>, Jared Zimmerman<sup>1</sup>, Ruth A. Didier<sup>2</sup>, Kristopher Nazor<sup>3</sup>, Jeanne F. Loring<sup>3</sup>, Zheng Lian<sup>4</sup>, Sherman Weissman<sup>4</sup>, Allan J. Robins<sup>5</sup>, Thomas C. Schulz<sup>5</sup>, Laura Menendez<sup>6</sup>, Michael J. Kulik<sup>6</sup>, Stephen Dalton<sup>6</sup>, Haitham Gabr<sup>7</sup>, Tamer Kahveci<sup>7</sup>, David M. Gilbert<sup>1,8</sup>

<sup>1</sup>Department of Biological Science, Florida State University, Tallahassee, FL, 32306-4295, USA.

<sup>2</sup>College of Medicine, Florida State University, Tallahassee, FL, 32306-4295, USA.

<sup>3</sup>Center for Regenerative Medicine, Department of Chemical Physiology, The Scripps Research Institute, La Jolla, California, USA.

<sup>4</sup>Department of Genetics, Yale University School of Medicine, New Haven, CT 06519, USA.

<sup>5</sup>ViaCyte, Inc., Athens, Georgia, USA.

<sup>6</sup>Department of Biochemistry and Molecular Biology, University of Georgia, Athens, GA 30602, USA.

<sup>7</sup>University of Florida, Gainesville.

<sup>8</sup>Center for Genomics and Personalized Medicine, Florida State University, Tallahassee, FL, USA.

### Supplementary methods

**RT datasets of distinct human cell types (ENCODE accession numbers)** [page 2](#)

**Differentiation protocols** [page 3](#)

1. Endoderm [page 3](#)

2. Mesoderm [page 6](#)

3. Neural crest (NC) and mesenchymal stem cells (MSC) differentiation. [page 8](#)

4. Ectoderm: Neural progenitors differentiation [page 9](#)

5. Myeloid and erythroid differentiation from CD34+ progenitors [page 10](#)

**Gene expression analysis** [page 11](#)

# Replication Timing (RT) datasets of distinct human cell types

**Endoderm**  
**Mesoderm**  
**Ectoderm**

→ In Vitro Differentiation Pathways  
 ..... Embryonic origin of Primary Cell / Immortalized Cell Lines

ENCODE accession numbers and links to RT datasets  
 ENCODE links to Differentiation Protocols

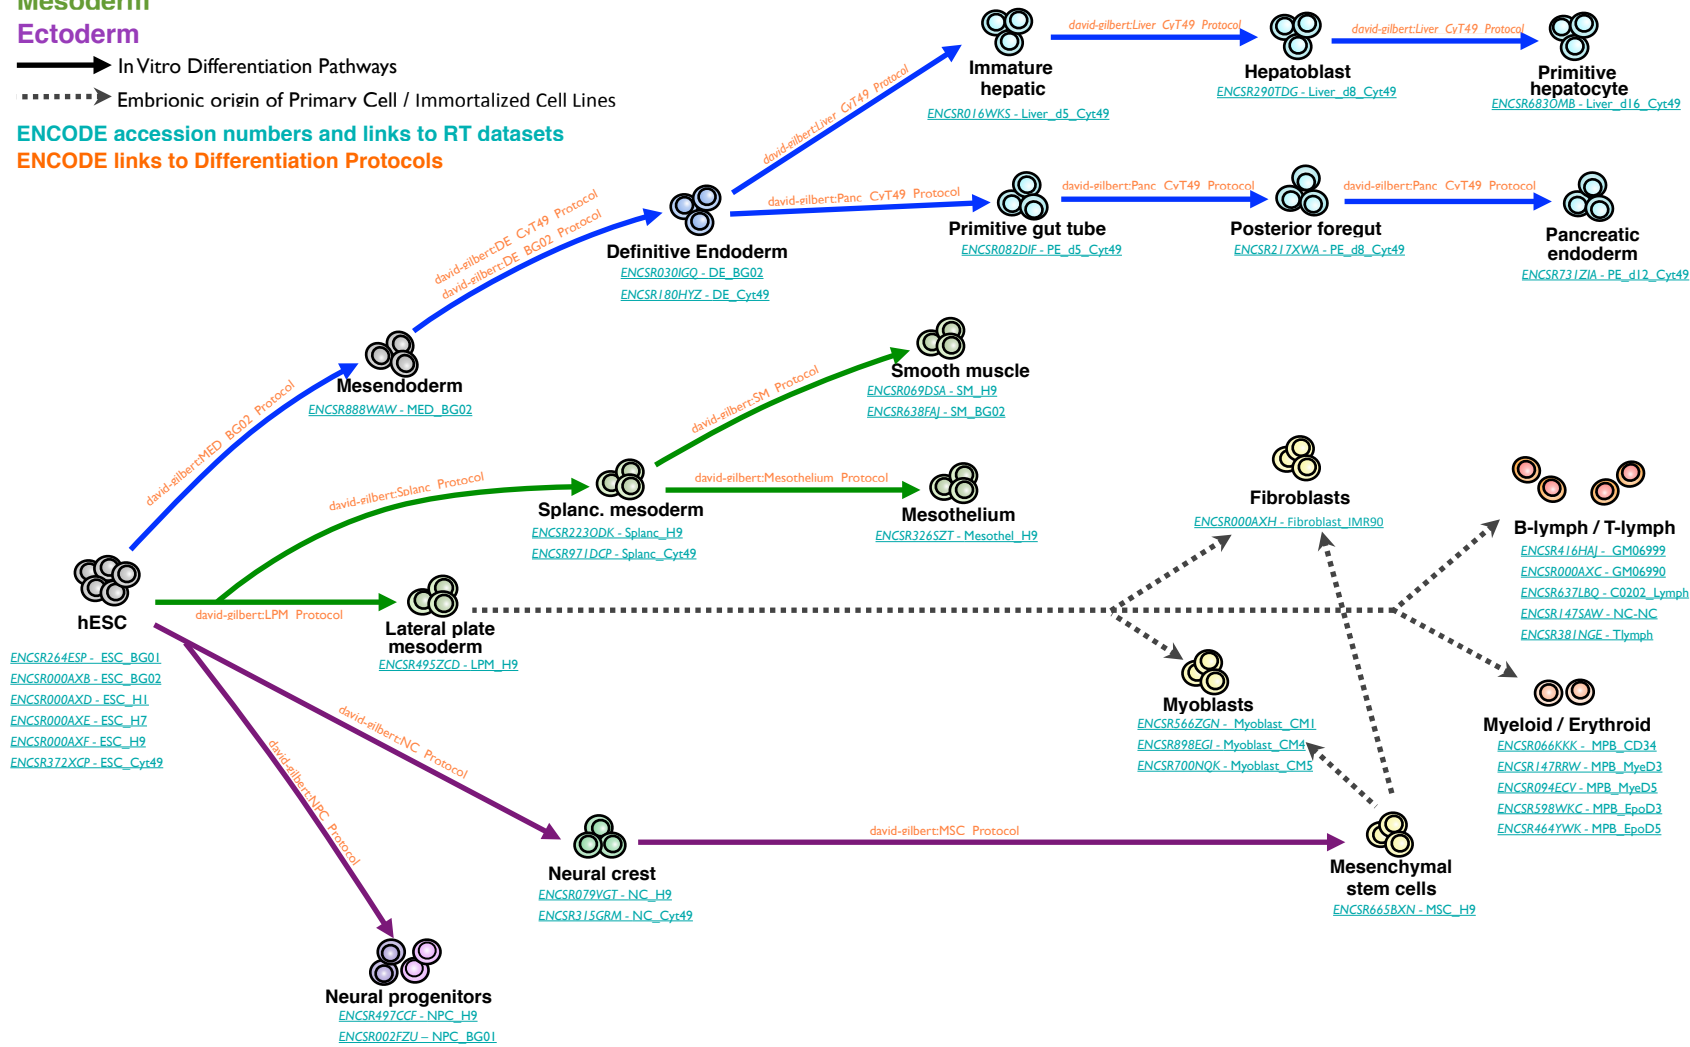

## Supplementary differentiation protocols

### 1. Endoderm

#### Mesendoderm (MED), definitive endoderm (DE), Pancreatic (Panc) and hepatic (Liver) differentiation of hESC aggregates in suspension.

Pancreatic samples consisted of pancreatic endoderm and immature endocrine cells and were made using a 12-day differentiation regime (Figure 1) as described in detail in (Schulz et al. 2012). Briefly, CyT49 hESC were aggregated in rotational suspension culture, then differentiated in a four-step sequential process to mesendoderm (MIXL1<sup>+</sup>), definitive endoderm (SOX17<sup>+</sup>, FOXA2<sup>+</sup>); primitive gut tube (HNF1B<sup>+</sup>, HNF4A<sup>+</sup>); posterior foregut (PDX1<sup>+</sup>); and pancreatic endoderm (NKX6-1<sup>+</sup>, PTF1A<sup>+</sup>) and endocrine cells (NGN3<sup>+</sup>, NKX2-2<sup>+</sup>, PAX4<sup>+</sup>, PAX6<sup>+</sup>), according to the following conditions:

| Time point | Stage       | Media Condition            | Rotation Speed |
|------------|-------------|----------------------------|----------------|
| d(-1)      | Aggregation | XF HA                      | 95             |
| d0         | 1           | r0.2FBS-ITS1:5000 A100 W50 | 95             |
| d1         |             | r0.2FBS-ITS1:5000 A100     | 95             |
| d2         | 2           | r0.2FBS-ITS1:1000 K25 IV   | 95             |
| d3         |             | r0.2FBS-ITS1:1000 K25      | 95             |
| d4         |             | r0.2FBS-ITS1:1000 K25      | 105            |
| d5         | 3           | db-CTT3 N50                | 105            |
| d6         |             | db-CTT3 N50                | 105            |
| d7         |             | db-CTT3 N50                | 105            |
| d8         | 4           | db-N50 K50 E50             | 105            |
| d9         |             | db-N50 K50 E50             | 95             |
| d10        |             | db-N50 K50 E50             | 95             |
| d11        |             | db-N50 K50 E50             | 95             |
| d12        | harvest     |                            |                |

**XF HA:** DMEM/F12 containing GlutaMAX (Life Technologies, cat#10565-042), supplemented with 10% v/v of Xeno-free KnockOut Serum Replacement (Life Technologies, cat#12618-001), 1% v/v non-essential amino acids (Life Technologies, cat#11140-050), 1% v/v penicillin/streptomycin (Life Technologies, cat#15070-063), 10 ng/mL heregulin-1 $\beta$  (Peprotech, cat#100-03) and 10 ng/mL activin A (R&D Systems, cat#338-AC). **r0.2FBS:** RPMI 1640 (Mediatech, cat#15-040-CV), 0.2% FBS (HyClone, cat#SH30070.03), 1x GlutaMAX-1 (Life Technologies, cat#35050-061), 1% v/v penicillin/streptomycin. **ITS:** Insulin-Transferrin-Selenium (Life Technologies, cat#41400-045) diluted 1:5000 or 1:1000. **A100:** 100 ng/mL recombinant human Activin A (R&D Systems, cat#338-AC). **W50:** 50 ng/mL recombinant mouse Wnt3A (R&D Systems, cat#1324-WN). **K25:** 25 ng/mL recombinant human KGF (R&D Systems, cat#251-KG). **IV:** 2.5 mM TGF- $\beta$  RI Kinase inhibitor IV (EMD Bioscience, cat#616454). **db:** DMEM HI Glucose (HyClone cat#SH30081.01) supplemented with 0.5x B-27 Supplement (Life Technologies, cat#17504-044), 1x GlutaMAX-1 and 1% v/v penicillin/streptomycin. **CTT3:** 0.25 mM KAAD-Cyclopamine (Toronto Research Chemicals, cat#K171000) and 3 nM TTNPB (Sigma-Aldrich, cat#T3757). **N50:** 50 ng/mL recombinant human Noggin (R&D Systems, cat#3344-NG). **K50:** 50 ng/mL recombinant human KGF (R&D Systems, cat#251-EG). **E50:** 50 ng/mL recombinant human EGF (R&D Systems, cat#236-EG).

Liver differentiation was carried out using modifications to stages 2-4 of the above protocol (Figure 1), resulting in an APF<sup>+</sup>, Albumin<sup>+</sup> and TAT<sup>+</sup> cell population.

| Time point | Stage       | Media Condition            | Rotation Speed |
|------------|-------------|----------------------------|----------------|
| d(-1)      | Aggregation | XF HA                      | 95             |
| d0         | 1           | r0.2FBS-ITS1:5000 A100 W50 | 95             |
| d1         |             | r0.2FBS-ITS1:5000 A100     | 95             |
| d2         | 2           | r0.2FBS-ITS1:1000 B100 F25 | 95             |
| d3         |             | r0.2FBS-ITS1:1000 B100 F25 | 95             |
| d4         |             | r0.2FBS-ITS1:1000 B100 F25 | 105            |
| d5         | 3           | db-B100                    | 105            |
| d6         |             | db-B100                    | 105            |
| d7         |             | db-B100                    | 105            |
| d8         | 4           | db-K50 E50                 | 105            |
| d9         |             | db-K50 E50                 | 95             |
| d10        |             | db-K50 E50                 | 95             |
| d11        |             | db-K50 E50                 | 95             |
| d12        |             | db-K50 E50                 | 95             |
| d13        |             | db-K50 E50                 | 95             |
| d14        |             | db-K50 E50                 | 95             |
| d15        |             | db-K50 E50                 | 95             |
| d16        | harvest     |                            |                |

**B100:** 100 ng/mL BMP4 (R&D Systems, cat#314-BP)

**F25:** 25 ng/mL FGF2 (Sigma, cat#F0291)

**FIGURE 1 (next page)**

**Directed pancreatic and liver differentiation of CyT49 in suspension culture.** (A) Schematic timeline of pancreatic (upper) and liver differentiation (lower) of CyT49 cells. Aggregates of undifferentiated hESC were generated in rotational suspension culture, and then differentiated through a 4-step process. Growth factors and small molecule inhibitors used to specify differentiation are indicated. HRG, heregulin 1 $\beta$ ; ACTA, Activin A; WNT, Wnt3A; KGF, keratinocyte growth factor (FGF7); IV, TGF- $\beta$  RI kinase inhibitor IV; CYC, cyclopamine; TT, TTNBP (retinoic acid analog); NOG, noggin; EGF, epidermal growth factor. (B) The dynamics of gene expression (qPCR) demonstrated that undifferentiated cells (OCT4) were directed through mesendoderm (MIXL1), definitive endoderm (SOX17, FOXA2), primitive gut tube (HNF4A, HNF1B), posterior foregut (PDX1), to form pancreatic endoderm (NKX6-1, PTF1A) and endocrine cells (NGN3, NKX2-2, PAX4, PAX6). BMP4 and FGF2 driven specification in stages 2 and 3 resulted in the generation of hepatic lineages (AFP, Albumin, TAT). Panc: pancreatic differentiation conditions, Liver: liver differentiation conditions. Day of differentiation indicated on x-axis.



FIGURE 1

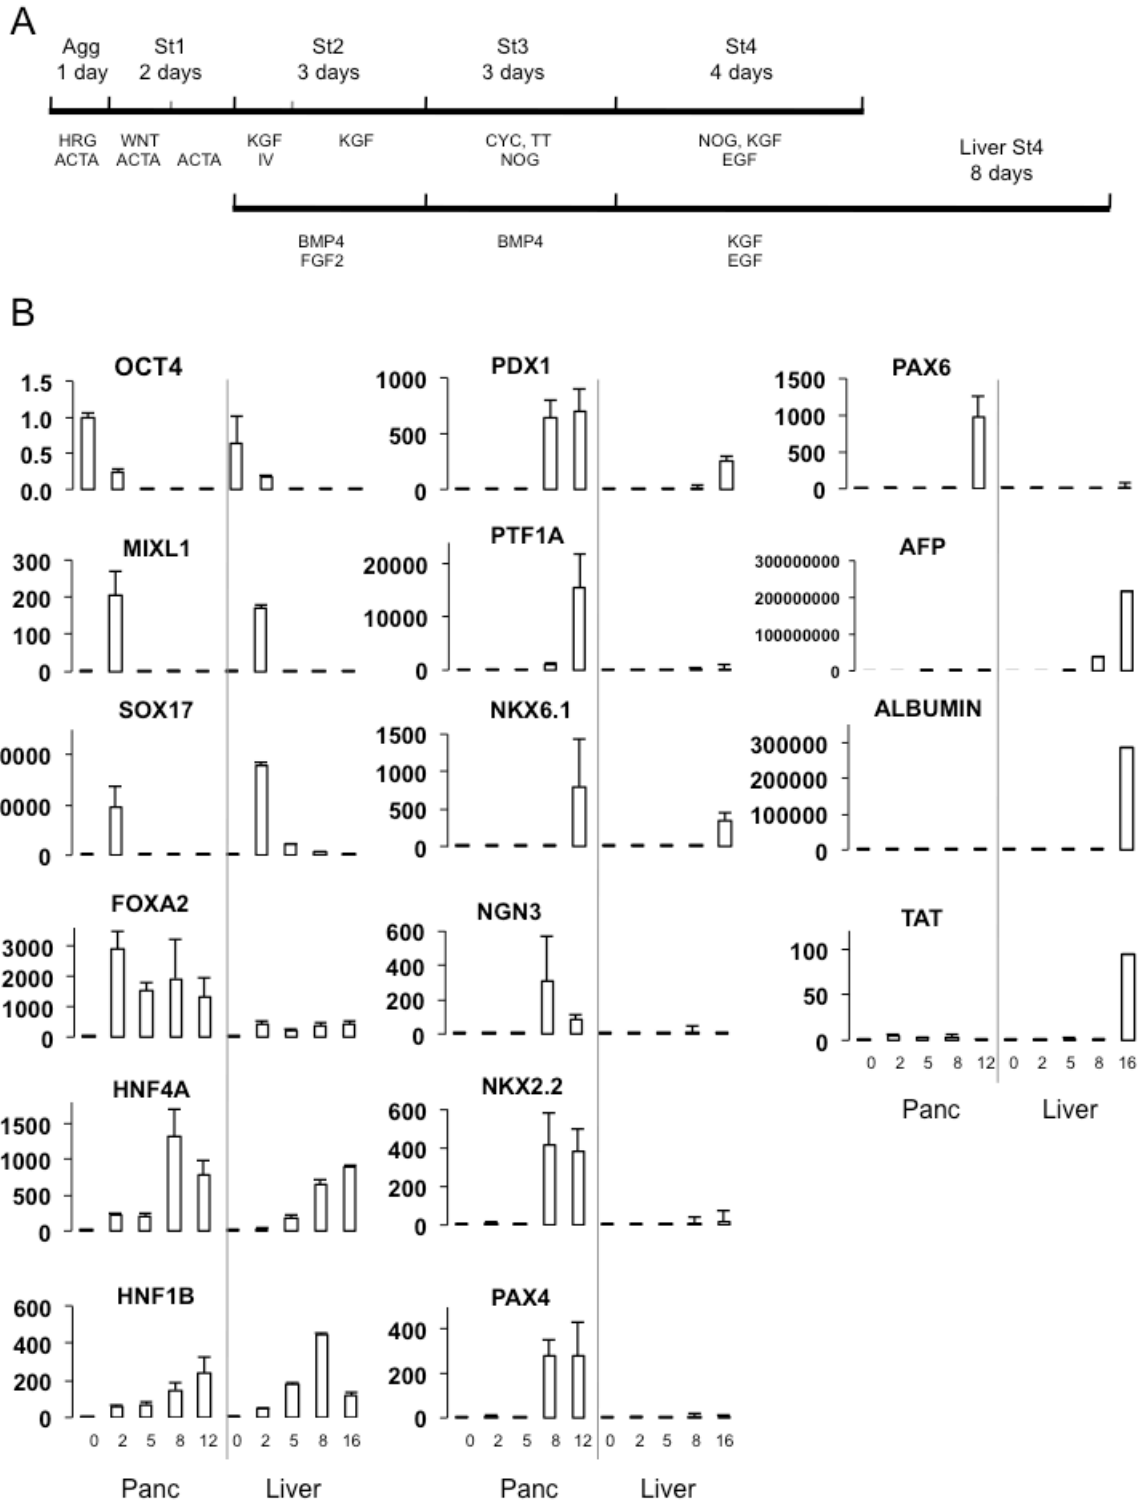

## 2. Mesoderm

### Lateral plate mesoderm (LPM):

Lateral plate mesoderm cells (T+, Nanog-) were derived from hESC in DMEM/F12, with 100 ng/ml Activin A, 20 ng/ml Fgf2, 25 ng/ml Wnt3a (R&D Systems) and BMP4 (R&D Systems) at 100 ng/ml for 2 days (Figure 2).

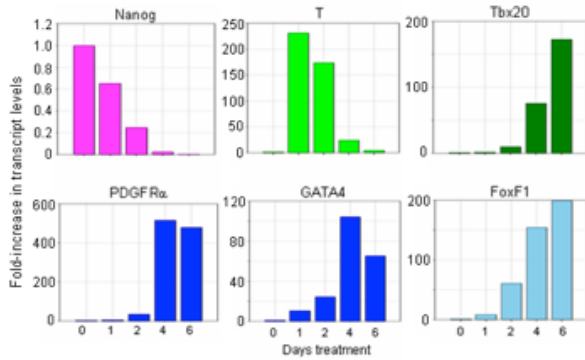

**Figure 2.** Gene expression profiling (qPCR) of hESCs differentiated towards a mesoderm fate in defined medium. LPM samples were collected at day 2 of differentiation.

### Splanchnic mesoderm (Splan):

Splanchnic mesoderm (PDGFR $\alpha$ +, GATA4+, FoxF1+, ISL1+ and Tbx20+) were derived from hESC in DMEM/F12, with 100 ng/ml Activin A, 20 ng/ml Fgf2, 25 ng/ml Wnt3a (R&D Systems) and BMP4 (R&D Systems) at 100 ng/ml for 4 days (Figure 3).

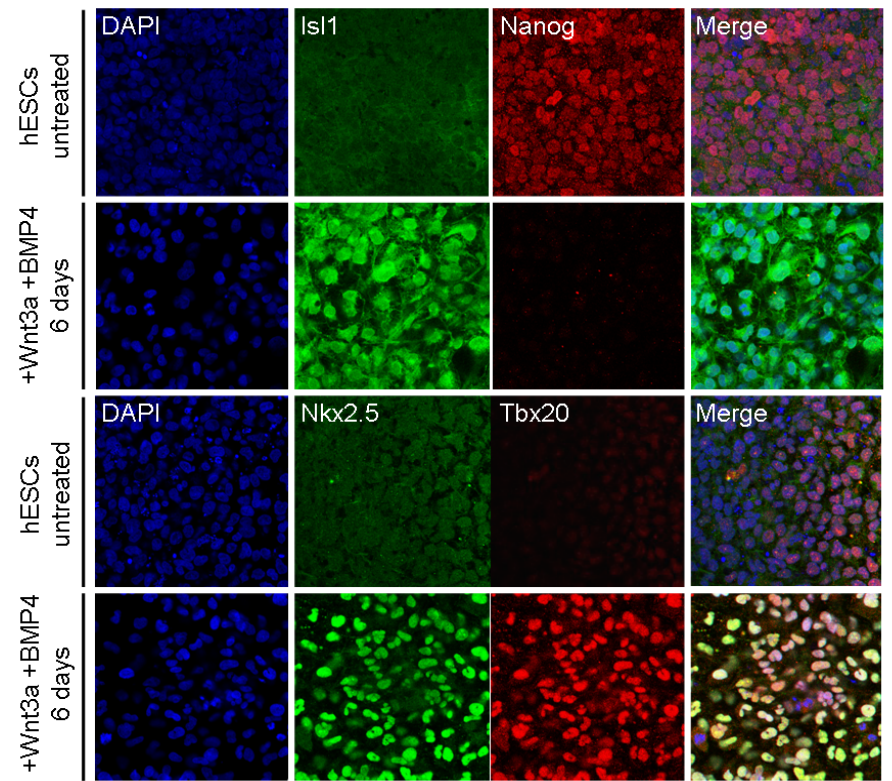

**Figure 3.** Generation of Isl1+ splanchnic mesoderm from hESCs. DAPI staining and immunofluorescence analysis for Isl1, Nanog, Nkx2.5 and Tbx20 of untreated (hESCs) and Wnt3a/BMP4 at day 4 of differentiation.

**Mesothelium:**

Mesothelial cells (Tbx5+, Raldh2+, WT1+) were derived from splanchnic mesoderm cells in the presence of Wnt3a (25ng/ml), BMP4 (50ng/ml) and all-trans retinoic acid (Sigma; 4 $\mu$ M) for 16 days (Figure 4).

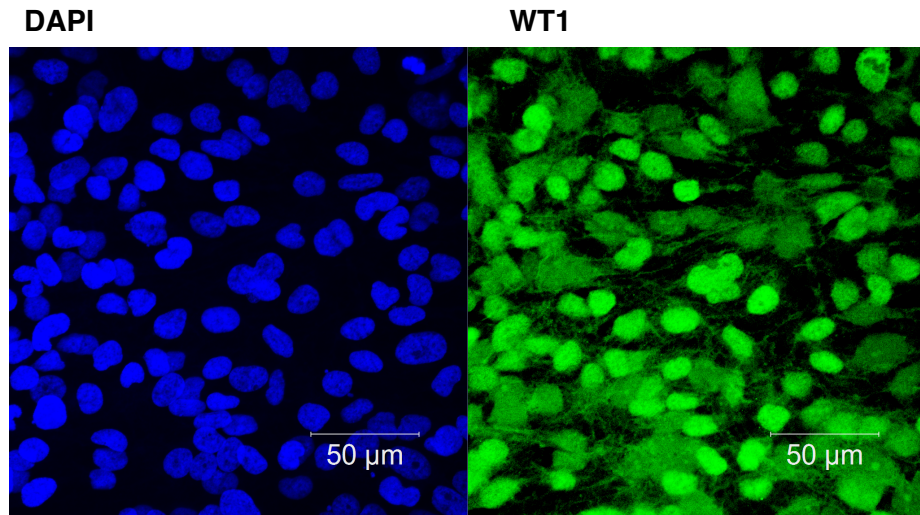

**Figure 4.** Immunofluorescence analysis of smooth muscle actin (SMA) and calponin for cells at day-16 of differentiation with Wnt3a/BMP4.

**Smooth Muscle:**

Smooth muscle cells (SMA+, SM-MHC+, CALD1+, calponin+) were differentiated from hESC in DMEM/F12, with 100 ng/ml Activin A, 20 ng/ml Fgf2, 25 ng/ml Wnt3a and BMP4 at 100 ng/ml for 18 days (Figure 5).

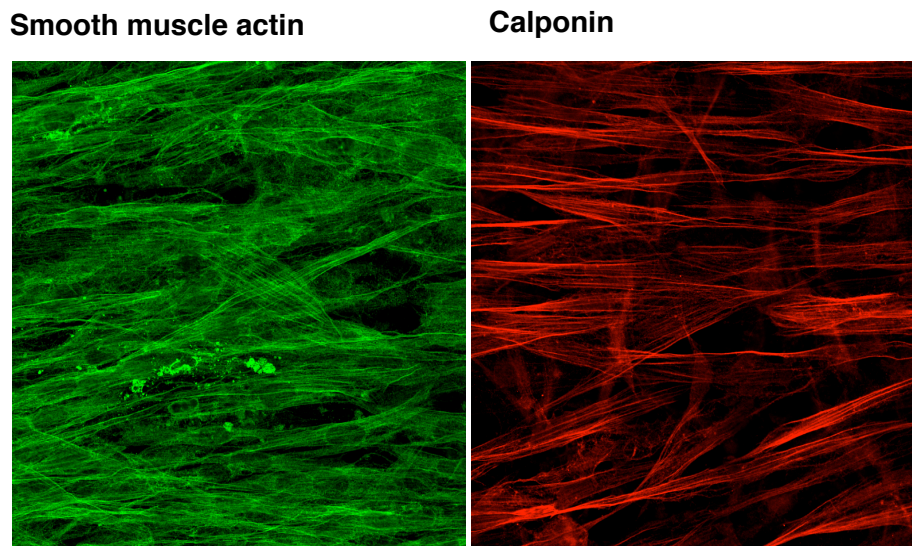

**Figure 5.** Immunofluorescence analysis of smooth muscle actin (SMA) and calponin for cells at day-16 of differentiation with Wnt3a/BMP4.

### 3. Neural crest (NC) and mesenchymal stem cells (MSC) differentiation.

For direct neural crest differentiation, hES cells were plated at a density of  $1 \times 10^5$  cells/cm<sup>2</sup> in defined media lacking Activin A and supplemented with 2 micromolar GSK3 inhibitor IX (BIO) and 20 micromolar SB 431542 (Menendez et al. 2011; 2013). Media was replaced every day. Neural crest identity was confirmed by immunocytochemistry (Figure 6) and RT-PCR positive detection of p75, Hnk1, AP2 and FoxD3 NC markers, as well as negative detection of hESCs markers (Sox2, Oct4, Nanog) and neural progenitor markers (Pax6, Sox2). For mesenchymal differentiation, neural crest cells were cultured in media containing 10% FBS and passed every 4–5 d, MSCs were CD73+, CD44+ and CD13+ by day 5 (Figure 7).

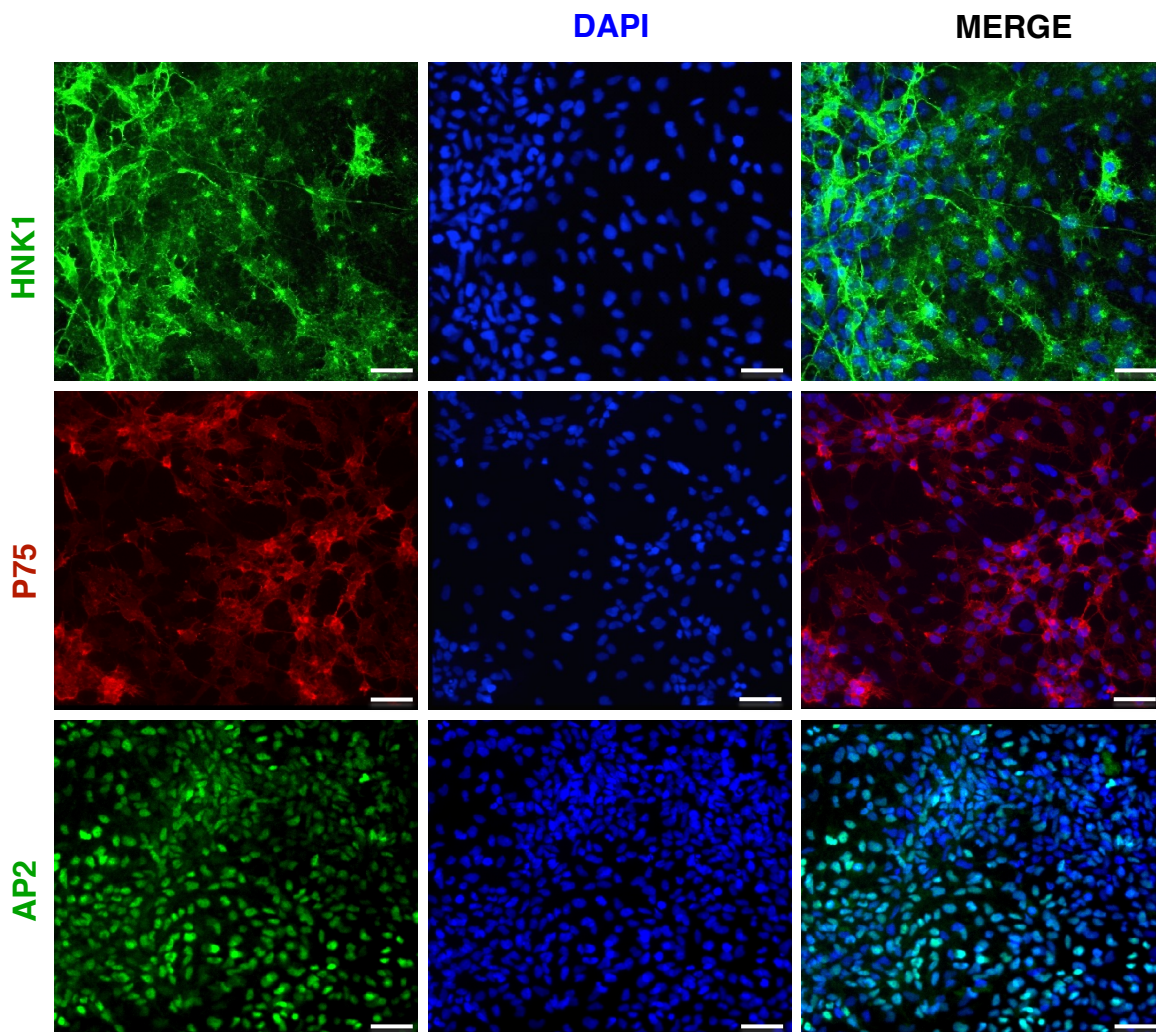

**Figure 6.** Immunofluorescence analysis for Hnk1, p75 and AP2 for hES cells differentiated with ActivinA and GSK3 inhibitor IX (BIO).



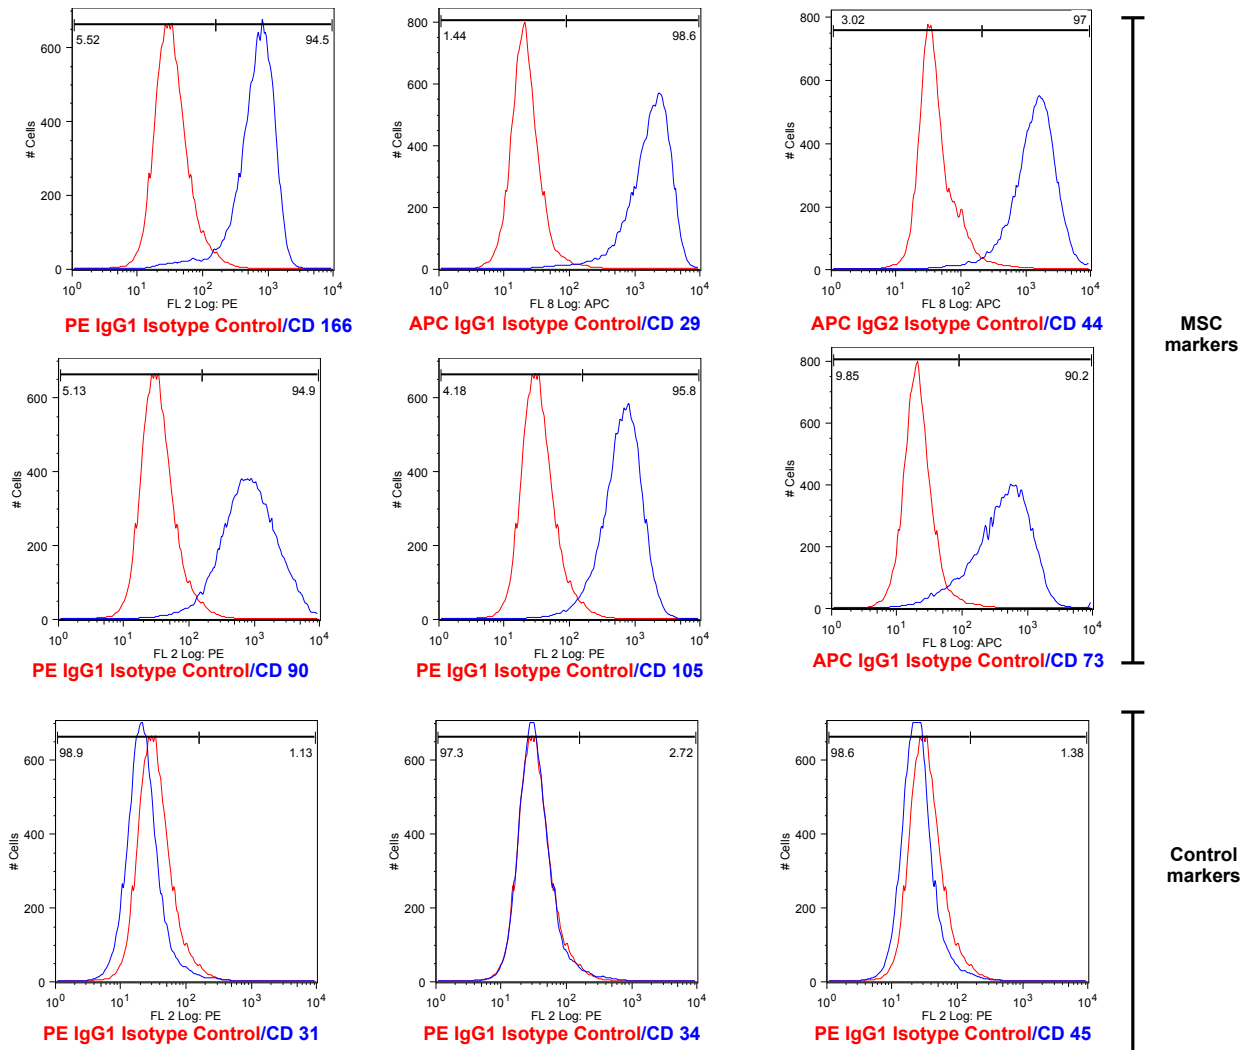

**Figure 7.** Flow cytometry analysis of differentiated cells with ActivinA and GSK3 inhibitor IX (BIO) after addition of FBS using distinct mesenchymal stem cells markers (CD166, CD29, CD44, CD73, Cd90, Cd105).

#### 4. Ectoderm: Neural progenitors differentiation.

Undifferentiated hESCs were plated and expanded in DM containing Noggin and SB431542 to induced neural differentiation. Cultures were split at day 7 and 14. FGF2 was added at day 14 to promote neural progenitor expansion. On day 28 the culture was split and neural progenitors expanded in DMEM/F12/B27 containing heregulin and FGF2. Q-PCR analysis demonstrated that these NP cells expressed SOX1, PAX6 (Figure 8), but were negative for OCT4, Rex1, Nanog, and CD9, in comparison to undifferentiated cells. Immunofluorescence confirmed that these progenitors were negative for OCT4, but expressed Sox2 and Nestin. This population can be expanded and maintained for >3 months in defined conditions (Schulz et al. 2003; 2004).

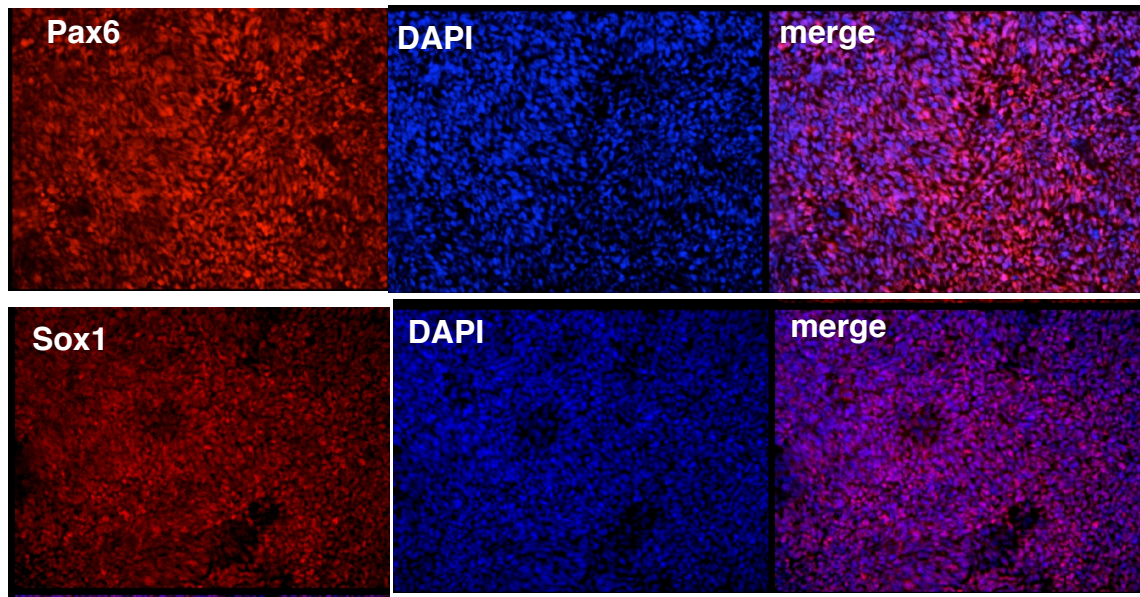

**Figure 8.** DAPI staining and immunofluorescence analysis of hESC derived NPCs for Pax6 and Sox1.

### 5. Myeloid and erythroid differentiation from CD34+ progenitors.

Human CD34+ peripheral blood stem and progenitor cells were used for cytokine-mediated erythroid or myeloid differentiation *in vitro* (Migliaccio et al. 2009; Mahajan et al. 2009; Heike and Nakahata 2002; Mayani et al. 1993; Manz et al. 2002). These cells, harvested from G-CSF-treated normal adults undergoing apheresis as stem cell transplant donors, were obtained from the Yale Center for Excellence in Molecular Hematology (Dr. Diane Krause, director) as de-identified samples. The CD34+ cells were selected using the Isolex 300i Magnetic Cell Selection System (Baxter), and cultured in StemSpan Expansion Medium (Stem Cell Technologies) with 1X Stem Span CC100 recombinant human cytokine cocktail containing 100 ng/mL Flt3 ligand, 100 ng/mL stem cell factor, 20 ng/mL IL-3, and 20 ng/mL IL-6. After seven days of expansion in culture, the cell number increased over 40 fold. The cells were differentiated by addition of lineage related cytokines

For myeloid differentiation, CD45RA+ cells were used and the stem cell expansion medium was supplemented as follows: Days 0-4: 50 ng/ml stem cell factor, 100 ng/ml Flt3 ligand, 5 ng/ml IL-3, 5 ng/ml GM-CSF, 30 ng/ml G-CSF; Days 4-7: 5 ng/ml IL-3, 30 ng/ml G-CSF; Days 7-12: 30 ng/ml G-CSF.

Erythroid differentiation was induced in the CD45RA- fraction of cells by an erythroid “cocktail” supplementing the stem cell expansion medium with 10ng/ml SCF, 5ng/ml IL3, recombinant erythropoietin 1 unit/ml, dexamethasone with a final concentration of 2 micromolar, and Estradiol with a final concentration of 0.2 micromolar.

### **Gene expression analysis**

Total RNA was extracted from snap-frozen sample pellets (Ambion mirVana Kit, Life Technologies, Inc.) according to the manufacturer's protocol. RNA quantity (Qubit™ RNA BR Assay Kits, Life Technologies, Inc.) and quality (RNA6000 Nano Kit and Bioanalyzer 2100, Agilent) was determined to be optimal for each sample prior to further processing. 200 ng RNA per sample was amplified using the Total Prep™ RNA Amplification Kit (Illumina, Inc.) according to manufacturer's protocol and quantified as above. 750 ng labeled RNA/sample was hybridized to humanHT-12v4 Expression BeadChips (Illumina, Inc.), scanned with an iScan (Illumina, Inc.). In GenomeStudio, probes were filtered for those detected at  $p < 0.01$  in at least 1 sample and exported for normalization in R using robust spline normalization (RSN). Probes in the array (47,000) were analyzed by BLAT (Kent 2002) and only unambiguous and highly specific probes were included in the analysis (25,000 specific probes against 16,000 RefSeq genes).

## References

Heike T, Nakahata T. 2002. Ex vivo expansion of hematopoietic stem cells by cytokines. *Biochim Biophys Acta* **1592**: 313–321.

Mahajan MC, Karmakar S, Newburger PE, Krause DS, Weissman SM. 2009. Dynamics of alpha-globin locus chromatin structure and gene expression during erythroid differentiation of human CD34(+) cells in culture. *Exp Hematol* **37**: 1143–1156.e3.

Manz MG, Miyamoto T, Akashi K, Weissman IL. 2002. Prospective isolation of human clonogenic common myeloid progenitors. *Proc Natl Acad Sci USA* **99**: 11872–11877.

Mayani H, Dragowska W, Lansdorp PM. 1993. Lineage commitment in human hemopoiesis involves asymmetric cell division of multipotent progenitors and does not appear to be influenced by cytokines. *J Cell Physiol* **157**: 579–586.

Menendez L, Kulik MJ, Page AT, Park SS, Lauderdale JD, Cunningham ML, Dalton S. 2013. Directed differentiation of human pluripotent cells to neural crest stem cells. *Nat Protoc* **8**: 203–212.

Menendez L, Yatskievych TA, Antin PB, Dalton S. 2011. Wnt signaling and a Smad pathway blockade direct the differentiation of human pluripotent stem cells to multipotent neural crest cells. *Proc Natl Acad Sci USA* **108**: 19240–19245.

Migliaccio AR, Whitsett C, Migliaccio G. 2009. Erythroid cells in vitro: from developmental biology to blood transfusion products. *Curr Opin Hematol* **16**: 259–268.

Schulz TC, Noggle SA, Palmarini GM, Weiler DA, Lyons IG, Pensa KA, Meedeniya ACB, Davidson BP, Lambert NA, Condie BG. 2004. Differentiation of Human Embryonic Stem Cells to Dopaminergic Neurons in Serum-Free Suspension Culture. *Stem Cells* **22**: 1218–1238.

Schulz TC, Palmarini GM, Noggle SA, Weiler DA, Mitalipova MM, Condie BG. 2003. Directed neuronal differentiation of human embryonic stem cells. *BMC Neurosci* **4**: 27.

Schulz TC, Young HY, Agulnick AD, Babin MJ, Baetge EE, Bang AG, Bhoumik A, Cepa I, Cesario RM, Haakmeester C, et al. 2012. A Scalable System for Production of Functional Pancreatic Progenitors from Human Embryonic Stem Cells ed. F.C. Lynn. *PLoS ONE* **7**: e37004.
