# Supplementary material for: Dynamic changes in replication timing and gene expression during lineage specification of human pluripotent stem cells
Source: HighWire-hosted journal article supplement (doi:10.1101/gr.187989.114), 2015-06-08
Supplement: Supp_Table1.xlsx [file Supp_Table1.xlsx]

## Sheet: RT_Datasets
Dynamic changes in replication timing and gene expression during lineage specification of human pluripotent stem cells
Juan Carlos Rivera-Mulia, Quinton Buckley, Takayo Sasaki, Jared Zimmerman, Ruth A. Didier, Kristopher Nazor, Jeanne F. Loring, Zheng Lian, Sherman Weissman, Allan J. Robins, Thomas C. Schulz, Laura Menendez, Michael J. Kulik, Stephen Dalton, Haitham Gabr, Tamer Kahveci, David M. Gilbert
Supplementary Table 1
List of RT datasets used in the present study. Types of replicates (biological replicates were independently differentiated from hESC, technical replicates were profiled from the same sample), cell types, cell lines and NCBI Gene Expression Omnibus (GEO; http://www.ncbi.nlm.nih.gov/geo/) and ENCODE (https://www.encodeproject.org) accession numbers are indicated.
Dataset	Cell Type	Cell line	GEO accession number	GEO series	Encode Experiment	Bilogical Replicate	Technical Replicate
ESC_Cyt49_R1	Human embryonic stem cell	CyT49	GSM1548607	GSE63428	ENCSR372XCP	B1
ESC_Cyt49_R2	Human embryonic stem cell	CyT49	GSM1548608	GSE63428	ENCSR372XCP	B2
DE_Cyt49_R1	Definitive endoderm	CyT49	GSM1548603	GSE63428	ENCSR180HYZ	B2	T4
DE_Cyt49_R2	Definitive endoderm	CyT49	GSM1548604	GSE63428	ENCSR180HYZ	B2	T5
DE_Cyt49_R3	Definitive endoderm	CyT49	GSM1548605	GSE63428	ENCSR180HYZ	B2	T1
DE_Cyt49_R4	Definitive endoderm	CyT49	GSM1548606	GSE63428	ENCSR180HYZ	B1
DE_Cyt49_R5	Definitive endoderm	CyT49	GSM1548626	GSE63428	ENCSR180HYZ	B2	T2
Liver_d5_Cyt49_R1	Immature hepatic (day 5 of differentiation to liver)	CyT49	GSM1548629	GSE63428	ENCSR016WKS	B1	T1
Liver_d8_Cyt49_R1	Hepatoblast (day 8 of differentiation to liver)	CyT49	GSM1548630	GSE63428	ENCSR290TDG	B1	T1
Liver_d16_Cyt49_R1	Primitive hepatocyte (day 16 of differentiation to liver)	CyT49	GSM1548609	GSE63428	ENCSR683OMB	B1
Liver_d16_Cyt49_R2	Primitive hepatocyte (day 16 of differentiation to liver)	CyT49	GSM1548627	GSE63428	ENCSR683OMB	B2
Liver_d16_Cyt49_R3	Primitive hepatocyte (day 16 of differentiation to liver)	CyT49	GSM1548628	GSE63428	ENCSR683OMB	B3
Panc_d5_Cyt49_R1	Primitive gut tube (day 5 of differentiation to Pancreas)	CyT49	GSM1548645	GSE63428	ENCSR082DIF	B1
Panc_d5_Cyt49_R2	Primitive gut tube (day 5 of differentiation to Pancreas)	CyT49	GSM1548646	GSE63428	ENCSR082DIF	B2
Panc_d8_Cyt49_R1	Posterior foregut (day 8 of differentiation to Pancreas)	CyT49	GSM1548647	GSE63428	ENCSR217XWA	B1
Panc_d12_Cyt49_R1	Pancreatic endoderm (day 12 of differentiation to Pancreas)	CyT49	GSM1548643	GSE63428	ENCSR731ZIA	B1	T1
Panc_d12_Cyt49_R2	Pancreatic endoderm (day 12 of differentiation to Pancreas)	CyT49	GSM1548644	GSE63428	ENCSR731ZIA	B2	T1
Panc_d12_Cyt49_R3	Pancreatic endoderm (day 12 of differentiation to Pancreas)	CyT49	GSM1548623	GSE63428	ENCSR731ZIA	B1	T2
Panc_d12_Cyt49_R4	Pancreatic endoderm (day 12 of differentiation to Pancreas)	CyT49	GSM1548624	GSE63428	ENCSR731ZIA	B2	T2
LPM_H9_R1	Lateral plate mesoderm	H9	GSM1548610	GSE63428	ENCSR495ZCD	B2	T1
LPM_H9_R2	Lateral plate mesoderm	H9	GSM1548611	GSE63428	ENCSR495ZCD	B2	T2
LPM_H9_R3	Lateral plate mesoderm	H9	GSM1548631	GSE63428	ENCSR495ZCD	B1	T1
LPM_H9_R4	Lateral plate mesoderm	H9	GSM1548612	GSE63428	ENCSR495ZCD	B1	T2
LPM_H9_R5	Lateral plate mesoderm	H9	GSM1548613	GSE63428	ENCSR495ZCD	B1	T3
Splanc_H9_R1	Splanchnic mesoderm	H9	GSM1548651	GSE63428	ENCSR223ODK	B2
Splanc_H9_R2	Splanchnic mesoderm	H9	GSM1548652	GSE63428	ENCSR223ODK	B1
Splanc_Cyt49_R1	Splanchnic mesoderm	CyT49	GSM1548625	GSE63428	ENCSR971DCP	B1
Splanc_Cyt49_R2	Splanchnic mesoderm	CyT49	GSM1548650	GSE63428	ENCSR971DCP	B2
Mesothel_Cyt49_R1	Mesothelial cells	CyT49	GSM1548614	GSE63428	ENCSR401KWO	B2
Mesothel_Cyt49_R2	Mesothelial cells	CyT49	GSM1548615	GSE63428	ENCSR401KWO	B1
Mesothel_H9_R1	Mesothelial cells	H9	GSM1548632	GSE63428	ENCSR326SZT	B1	T1
Mesothel_H9_R2	Mesothelial cells	H9	GSM1548616	GSE63428	ENCSR326SZT	B1	T2
Mesothel_H9_R3	Mesothelial cells	H9	GSM1548617	GSE63428	ENCSR326SZT	B2
SM_H9_R1	Smooth muscle	H9	GSM1548648	GSE63428	ENCSR069DSA	B1
SM_H9_R2	Smooth muscle	H9	GSM1548649	GSE63428	ENCSR069DSA	B2
NC_H9_R1	Neural crest	H9	GSM1548621	GSE63428	ENCSR079VGT	B1	T1
NC_H9_R2	Neural crest	H9	GSM1548639	GSE63428	ENCSR079VGT	B1	T2
NC_H9_R3	Neural crest	H9	GSM1548640	GSE63428	ENCSR079VGT	B2
NC_H9_R4	Neural crest	H9	GSM1548641	GSE63428	ENCSR079VGT	B3
NC_Cyt49_R1	Neural crest	CyT49	GSM1548619	GSE63428	ENCSR315GRM	B2
NC_Cyt49_R2	Neural crest	CyT49	GSM1548620	GSE63428	ENCSR315GRM	B1
MSC_H9_R1	Mesenchymal stem cells	H9	GSM1548618	GSE63428	ENCSR665BXN	B2
MSC_H9_R2	Mesenchymal stem cells	H9	GSM1548638	GSE63428	ENCSR665BXN	B1
NPC_H9_R1	Neural progenitor cells	H9	GSM1548642	GSE63428	ENCSR497CCF	B1	T2
NPC_H9_R2	Neural progenitor cells	H9	GSM1548622	GSE63428	ENCSR497CCF	B1	T1
MPB_CD34_R1	Human CD34+ peripheral blood	–	GSM1548633	GSE63428	ENCSR066KKK	B1
MPB_MyeD3_R1	Day 3 of myeloid differentiation of CD34+ cells.	–	GSM1548636	GSE63428	ENCSR147RRW	B1
MPB_EpoD3_R1	Day 3 of erythroid differentiation of CD34+ cells.	–	GSM1548634	GSE63428	ENCSR598WKC	B1
MPB_EpoD5_R1	Day 5 of erythroid differentiation of CD34+ cells.	–	GSM1548635	GSE63428	ENCSR464YWK	B1
MPB_MyeD5_R1	Day 5 of myeloid differentiation of CD34+ cells.	–	GSM1548637	GSE63428	ENCSR094ECV	B1
ESC_BG02_R1	Human embryonic stem cell	BG02	GSM500933	GSE20027	ENCSR000AXB	B1
ESC_BG02_R2	Human embryonic stem cell	BG02	GSM500934	GSE20027	ENCSR000AXB	B2
ESC_H7_R1	Human embryonic stem cell	H7	GSM500935	GSE20027	ENCSR000AXE	B1
ESC_H9_R1	Human embryonic stem cell	H9	GSM500936	GSE20027	ENCSR000AXF	B1
ESC_H9_R2	Human embryonic stem cell	H9	GSM500936	GSE20027	ENCSR000AXF	B2
ESC_BG01_R1	Human embryonic stem cell	BG01	GSM500932	GSE20027	ENCSR264ESP	B1
ESC_H1_R1	Human embryonic stem cell	H1	GSM1548593	GSE63428	ENCSR000AXD	B1
ESC_H1_R2	Human embryonic stem cell	H1	GSM1548594	GSE63428	ENCSR000AXD	B2
iPS4_R1	Induced pluripotent stem cells	–	GSM500937	GSE20027	ENCSR000AXA	B1	T1
iPS4_R2	Induced pluripotent stem cells	–	GSM500938	GSE20027	ENCSR000AXA	B1	T2
iPS5_R1	Induced pluripotent stem cells	–	GSM500939	GSE20027	ENCSR000AVZ	B1	T1
iPS5_R2	Induced pluripotent stem cells	–	GSM500940	GSE20027	ENCSR000AVZ	B1	T2
MED_BG02_R1	Mesendoderm	BG02	GSM1548597	GSE63428	ENCSR888WAW	B1
MED_BG02_R2	Mesendoderm	BG02	GSM1548598	GSE63428	ENCSR888WAW	B2
DE_BG02_R1	Definitive endoderm	BG02	GSM1548595	GSE63428	ENCSR030IGQ	B1
DE_BG02_R2	Definitive endoderm	BG02	GSM1548596	GSE63428	ENCSR030IGQ	B2
Splanc_BG02_R1	Splanchnic mesoderm	BG02	GSM1548601	GSE63428	ENCSR599KJC	B1
Splanc_BG02_R2	Splanchnic mesoderm	BG02	GSM1548602	GSE63428	ENCSR599KJC	B2
SM_BG02_R1	Smooth muscle	BG02	GSM1548599	GSE63428	ENCSR638FAJ	B1
SM_BG02_R2	Smooth muscle	BG02	GSM1548600	GSE63428	ENCSR638FAJ	B2
Myoblast_CM5_R1	Myoblasts	–	GSM843869	GSE34197	ENCSR700NQK	B1
Myoblast_CM4_R1	Myoblasts	–	GSM843868	GSE34197	ENCSR898EGI	B2
Myoblast_CM1_R1	Myoblasts	–	GSM843867	GSE34197	ENCSR566ZGN	B3
Fibroblast_IMR90_R1	Fibroblasts	IMR90	GSM942307	GSE38460	ENCSR000AXH	B1
NPC_BG01_R1	Neural progenitor cells	BG01	GSM500941	GSE20027	ENCSR002FZU	B1
NPC_BG01_R2	Neural progenitor cells	BG01	GSM500942	GSE20027	ENCSR002FZU	B2
C0202_R1	Lymphoblasts	C0202	GSM931321	GSE37987	ENCSR637LBQ	B1	T1
C0202_R2	Lymphoblasts	C0202	GSM931322	GSE37987	ENCSR637LBQ	B1	T2
GM06990_R1	Lymphoblasts	GM06990	GSM931323	GSE37987	ENCSR000AXC	B1	T1
GM06990_R2	Lymphoblasts	GM06990	GSM931324	GSE37987	ENCSR000AXC	B1	T2
GM06999_R2	Lymphoblasts	GM06999	GSM931325	GSE37987	ENCSR416HAJ	B1	T1
GM06999_R1	Lymphoblasts	GM06999	GSM931326	GSE37987	ENCSR416HAJ	B1	T2
NC.NC_R1	Lymphoblasts	NC.NC	GSM931327	GSE37987	ENCSR147SAW	B1
Tlymph_R1	T-cells	–	GSM931329	GSE37987	ENCSR381NGE	B1
